# Supplementary material
Source: Springer Nature journal article supplement (https://www.springermedizin.de/resource/supplementary/13053_2013_481_MOESM3_ESM.pdf/9673846)

Colombia

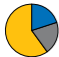

- Founder Mutations
- Recurrent Mutations
- Unique Mutations
- VUS

Brazil

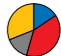

Chile

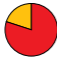

Uruguay

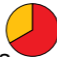

Argentina

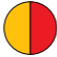

Supplement: MOESM3 [file 9673846]
